# Supplementary material for: Worldwide patterns of genomic variation and admixture in gray wolves
Source: HighWire-hosted journal article supplement (doi:10.1101/gr.197517.115), 2015-12-17
Supplement: SuppTable_1.docx [file SuppTable_1.docx]

Table S1. The detail information of samples in this study, which including species name, population, code and genome coverage

| Name | Species | Population | Location | Genome coverage |
| --- | --- | --- | --- | --- |
| Chinese indigenous dog 1$ | Dog | Chinese indigenous dog | Xi'an, China | 14 |
| Chinese indigenous dog 2$ | Dog | Chinese indigenous dog | Simao, China | 15.2 |
| Chinese indigenous dog 3$ | Dog | Chinese indigenous dog | Ya'an, China | 10.42 |
| Tibetan mastiff $ | Dog | Tibetan mastiff | Lijiang, China | 12.61 |
| Basenji # | Dog | Basenji | Bethesda, MD, USA | 12.6 |
| Dingo # | Dog | Dingo | Bargo Dingo Sanctuary, Australia | 25.75 |
| Spanish wolf * | Gray wolf | Europe | Spain | 25.29 |
| Croatian wolf # | Gray wolf | Europe | Perković, Croatia | 25.3 |
| Italian wolf * | Gray wolf | Europe | Italy | 13.01 |
| Portuguese wolf * | Gray wolf | Europe | Portugal (N of Douro) | 26.1 |
| Mexican wolf * | Mexican Gray wolf | North America | Captive | 24.62 |
| Yellow stone wolf 1 * | Gray wolf | North America | Yellowstone NP | 27.11 |
| Yellow stone wolf 2 * | Gray wolf | North America | Yellowstone NP | 25.1 |
| Yellow stone wolf 3 * | Gray wolf | North America | Yellowstone NP | 9.1 |
| Inner Mongolia wolf 1 # | Gray wolf | Asia | San Diego Zoo; Maybe Inner Mongolia | 24.6 |
| Inner Mongolia wolf 2 $ | Gray wolf | Asia | Inner Mongolia, China | 7.95 |
| Inner Mongolia wolf 3 @ | Gray wolf | Asia | Inner Mongolia, China | 25.67 |
| Inner Mongolia wolf 4 @ | Gray wolf | Asia | Inner Mongolia, China | 22.93 |
| Xinjiang wolf 1 @ | Gray wolf | Asia | Xinjiang, China | 24.29 |
| Xinjiang wolf 2 @ | Gray wolf | Asia | Xinjiang, China | 26.87 |
| Qinghai wolf 1 @ | Gray wolf | Asia | Qinghai, China | 25.93 |
| Qinghai wolf 2 @ | Gray wolf | Asia | Qinghai, China | 26.44 |
| Tibet wolf 1 @ | Gray wolf | Asia | Tibet, China | 25.89 |
| Tibet wolf 2 @ | Gray wolf | Asia | Tibet, China | 25.85 |
| Indian wolf * | Gray wolf | Middle East | India (Koln Zoo) | 26.03 |
| Central Russian wolf $ | Gray wolf | Asia | Altai, Russia | 12.38 |
| Eastern Russian wolf $ | Gray wolf | Asia | Chukotka, Russia | 9.05 |
| Western Russian wolf $ | Gray wolf | Europe | Bryansk, Russia | 13.17 |
| Iranian wolf * | Gray wolf | Middle East | Iran | 27.94 |
| Israeli wolf # | Gray wolf | Middle East | Neve Ativ, Golan Heights, Israel | 21.6 |
| Kenya golden jackal * | Golden jackal | Africa | Kenya | 25.77 |
| Israeli golden jackal # | Golden jackal | Middle East | Tel Aviv, Israel | 23.8 |
| California coyote * | Coyote | North America (Western) | California | 25.52 |

* Generated in this study

$ Raw data were downloaded from Wang et al. 2013

@ Raw data were downloaded from Zhang et al. 2014

# Genotype results were obtained from the authors of Freedman et al. 2014
