# Supplementary material for: Worldwide patterns of genomic variation and admixture in gray wolves
Source: HighWire-hosted journal article supplement (doi:10.1101/gr.197517.115), 2015-12-17
Supplement: SuppTable_2.xlsx [file SuppTable_2.xlsx]

## Sheet: Sheet1
Table S2. The PCR duplicates, genome coverage, and sites information
Name	PCR duplicates (%)	Genome coverage	Non-variant sites	Numbers of SNPs			Total sites	Heterozygosity	SNP rate
				Heterozygous SNPs	Homozygous SNPs	Total SNPs
Chinese indigenous dog 1	20.82	14	803248629	1309187	513017	1822204	805070833	0.00162618	0.00226341
Chinese indigenous dog 2	22.39	15.2	1272599310	1217405	944618	2162023	1274761333	0.000955006	0.00169602
Chinese indigenous dog 3	12.99	10.42	750804488	1181229	562823	1744052	752548540	0.00156964	0.00231753
Tibetan mastiff	5.76	12.61	1216398524	1494005	718085	2212090	1218610614	0.00122599	0.00181526
Basenji	28.5	12.6	1131597756	952848	949823	1902671	1133500427	0.000840624	0.00167858
Dingo	28.5	25.75	1308195288	742600	1416283	2158883	1310354171	0.000566717	0.00164756
Spanish wolf	20.62	25.29	1365732542	1789063	1351763	3140826	1368873368	0.00130696	0.00229446
Croatian wolf	16	25.3	1288847615	1815538	1183760	2999298	1291846913	0.00140538	0.00232171
Italian wolf	55.08	13.01	1210244651	1473009	1360614	2833623	1213078274	0.00121427	0.00233589
Portuguese wolf	12.57	26.1	1365562467	1387157	1661711	3048868	1368611335	0.00101355	0.00222771
Mexican wolf	4.72	24.62	1375906180	633161	2138138	2771299	1378677479	0.000459252	0.00201011
Yellow Stone wolf 1	6.42	27.11	1378055183	1817301	1541004	3358305	1381413488	0.00131554	0.00243106
Yellow Stone wolf 2	4.77	25.1	1375726990	1924746	1489098	3413844	1379140834	0.00139561	0.00247534
Yellow Stone wolf 3	64.35	9.1	819854963	1604333	858833	2463166	822318129	0.00195099	0.00299539
Inner Mongolia wolf 1	6.69	24.6	1369359640	1665253	1520771	3186024	1372545664	0.00121326	0.00232125
Inner Mongolia wolf 2	6.19	7.95	668228310	1458901	527345	1986246	670214556	0.00217677	0.0029636
Inner Mongolia wolf 3	11.49	25.67	1367267191	1841660	1393626	3235286	1370502477	0.00134378	0.00236066
Inner Mongolia wolf 4	15.96	22.93	1352264802	1996707	1278791	3275498	1355540300	0.001473	0.00241638
Xinjiang wolf 1	6.93	24.29	1363690421	2164974	1237352	3402326	1367092747	0.00158363	0.00248873
Xinjiang wolf 2	6.82	26.87	1367249609	2215265	1225522	3440787	1370690396	0.00161617	0.00251026
Qinghai wolf 1	10.62	25.93	1371964002	1835047	1459374	3294421	1375258423	0.00133433	0.00239549
Qinghai wolf 2	8.62	26.44	1365287769	1641837	1557576	3199413	1368487182	0.00119975	0.00233792
Tibet wolf 1	10.06	25.89	1363362087	954748	1938855	2893603	1366255690	0.000698806	0.00211791
Tibet wolf 2	9.41	25.85	1365396492	1170059	1807144	2977203	1368373695	0.000855073	0.00217572
Indian wolf	6.49	26.03	1377349627	2305572	1290241	3595813	1380945440	0.00166956	0.00260388
Central Russian wolf	8.25	12.38	911425890	1732836	824677	2557513	913983403	0.00189592	0.00279821
Eastern Russian wolf	8.08	9.05	683598733	1412388	718504	2130892	685729625	0.00205969	0.00310748
Western Russian wolf	4.2	13.17	1204008617	1868427	974059	2842486	1206851103	0.00154818	0.00235529
Iranian wolf	11.31	27.94	1369176495	2206398	1309775	3516173	1372692668	0.00160735	0.00256152
Israeli wolf	20.2	21.6	1335801804	2128929	1100567	3229496	1339031300	0.0015899	0.00241182
kenya golden jackal	6.57	25.77	1363012971	1466825	2773320	4240145	1367253116	0.00107283	0.00310121
Israeli golden jackal	51.5	23.8	1310197591	1919318	2833078	4752396	1314949987	0.00145961	0.00361413
California coyote	8.98	25.52	1374588619	2187884	2101381	4289265	1378877884	0.00158671	0.00311069
