# Supplementary material for: Worldwide patterns of genomic variation and admixture in gray wolves
Source: HighWire-hosted journal article supplement (doi:10.1101/gr.197517.115), 2015-12-17
Supplement: SuppTable_3.xlsx [file SuppTable_3.xlsx]

## Sheet: OldWorld
Table S3. ABBA-BABA test (D-statistic) using Israeli golden jackal as outgroup. Different dogs were put in P3 in the tests. For Asian wolves, three Chinese indigenous dogs, Tibetan mastiff, and dingo were included. For European and Middle Eastern wolves, basenji and boxer were included. Z score with absolute value bigger than 3 was considered significant.
P1	P2	P3	O	D Statistic	Standard Error	Z Score	significant and Direction
Inner Mongolia wolf 1	Indian wolf	Chinese indigenous dog 1	Israeli golden jackal	-0.0338378	0.00429011	-7.88739	Inner Mongolia wolf 1 and Chinese indigenous dog 1
Inner Mongolia wolf 2	Indian wolf	Chinese indigenous dog 1	Israeli golden jackal	-0.0804612	0.00382809	-21.0186	Inner Mongolia wolf 2 and Chinese indigenous dog 1
Inner Mongolia wolf 3	Indian wolf	Chinese indigenous dog 1	Israeli golden jackal	-0.0429094	0.00359707	-11.929	Inner Mongolia wolf 3 and Chinese indigenous dog 1
Inner Mongolia wolf 4	Indian wolf	Chinese indigenous dog 1	Israeli golden jackal	-0.039193	0.003616	-10.8388	Inner Mongolia wolf 4 and Chinese indigenous dog 1
Xinjiang wolf 1	Indian wolf	Chinese indigenous dog 1	Israeli golden jackal	-0.0331278	0.00350112	-9.46204	Xinjiang wolf 1 and Chinese indigenous dog 1
Xinjiang wolf 2	Indian wolf	Chinese indigenous dog 1	Israeli golden jackal	-0.031021	0.00347782	-8.91965	Xinjiang wolf 2 and Chinese indigenous dog 1
Qinghai wolf 1	Indian wolf	Chinese indigenous dog 1	Israeli golden jackal	-0.0108792	0.00439615	-2.47472	None significant
Qinghai wolf 2	Indian wolf	Chinese indigenous dog 1	Israeli golden jackal	-0.00143863	0.0051327	-0.280287	None significant
Tibetan wolf 1	Indian wolf	Chinese indigenous dog 1	Israeli golden jackal	0.0177146	0.00574483	3.08358	Indian wolf and Chinese indigenous dog 1
Tibetan wolf 2	Indian wolf	Chinese indigenous dog 1	Israeli golden jackal	0.0159474	0.00564784	2.82362	None significant
Central Russian wolf	Indian wolf	Chinese indigenous dog 1	Israeli golden jackal	-0.0622593	0.00420644	-14.801	Central Russian wolf and Chinese indigenous dog 1
Eastern Russian wolf	Indian wolf	Chinese indigenous dog 1	Israeli golden jackal	-0.0715023	0.00400214	-17.866	Eastern Russian wolf and Chinese indigenous dog 1
Indian wolf	Inner Mongolia wolf 1	Chinese indigenous dog 1	Israeli golden jackal	0.0329884	0.00414751	7.95378	Inner Mongolia wolf 1 and Chinese indigenous dog 1
Indian wolf	Inner Mongolia wolf 2	Chinese indigenous dog 1	Israeli golden jackal	0.081523	0.0038053	21.4236	Inner Mongolia wolf 2 and Chinese indigenous dog 1
Indian wolf	Inner Mongolia wolf 3	Chinese indigenous dog 1	Israeli golden jackal	0.0422324	0.00364985	11.571	Inner Mongolia wolf 3 and Chinese indigenous dog 1
Indian wolf	Inner Mongolia wolf 4	Chinese indigenous dog 1	Israeli golden jackal	0.03806	0.003597	10.5811	Inner Mongolia wolf 4 and Chinese indigenous dog 1
Indian wolf	Xinjiang wolf 1	Chinese indigenous dog 1	Israeli golden jackal	0.033869	0.00362571	9.34134	Xinjiang wolf 1 and Chinese indigenous dog 1
Indian wolf	Xinjiang wolf 2	Chinese indigenous dog 1	Israeli golden jackal	0.0339628	0.00360429	9.42289	Xinjiang wolf 2 and Chinese indigenous dog 1
Indian wolf	Qinghai wolf 1	Chinese indigenous dog 1	Israeli golden jackal	0.00913177	0.00438727	2.08142	None significant
Indian wolf	Qinghai wolf 2	Chinese indigenous dog 1	Israeli golden jackal	0.000398113	0.00514336	0.0774032	None significant
Indian wolf	Tibetan wolf 1	Chinese indigenous dog 1	Israeli golden jackal	-0.0160014	0.00571267	-2.80104	None significant
Indian wolf	Tibetan wolf 2	Chinese indigenous dog 1	Israeli golden jackal	-0.0170226	0.00574655	-2.96223	None significant
Indian wolf	Central Russian wolf	Chinese indigenous dog 1	Israeli golden jackal	0.0634166	0.00418456	15.1549	Central Russian wolf and Chinese indigenous dog 1
Indian wolf	Eastern Russian wolf	Chinese indigenous dog 1	Israeli golden jackal	0.0712341	0.00400846	17.7709	Eastern Russian wolf and Chinese indigenous dog 1
Inner Mongolia wolf 1	Indian wolf	Chinese indigenous dog 2	Israeli golden jackal	-0.045341	0.00416897	-10.8758	Inner Mongolia wolf 1 and Chinese indigenous dog 2
Inner Mongolia wolf 2	Indian wolf	Chinese indigenous dog 2	Israeli golden jackal	-0.0785622	0.00379646	-20.6936	Inner Mongolia wolf 2 and Chinese indigenous dog 2
Inner Mongolia wolf 3	Indian wolf	Chinese indigenous dog 2	Israeli golden jackal	-0.0535923	0.00369693	-14.4964	Inner Mongolia wolf 3 and Chinese indigenous dog 2
Inner Mongolia wolf 4	Indian wolf	Chinese indigenous dog 2	Israeli golden jackal	-0.0497806	0.00354424	-14.0455	Inner Mongolia wolf 4 and Chinese indigenous dog 2
Xinjiang wolf 1	Indian wolf	Chinese indigenous dog 2	Israeli golden jackal	-0.0392258	0.00370527	-10.5865	Xinjiang wolf 1 and Chinese indigenous dog 2
Xinjiang wolf 2	Indian wolf	Chinese indigenous dog 2	Israeli golden jackal	-0.0405433	0.0036137	-11.2193	Xinjiang wolf 2 and Chinese indigenous dog 2
Qinghai wolf 1	Indian wolf	Chinese indigenous dog 2	Israeli golden jackal	-0.0232426	0.00414859	-5.60253	Qinghai wolf 1 and Chinese indigenous dog 2
Qinghai wolf 2	Indian wolf	Chinese indigenous dog 2	Israeli golden jackal	-0.0102171	0.00486728	-2.09913	None significant
Tibetan wolf 1	Indian wolf	Chinese indigenous dog 2	Israeli golden jackal	0.00560665	0.00530379	1.0571	None significant
Tibetan wolf 2	Indian wolf	Chinese indigenous dog 2	Israeli golden jackal	0.00495352	0.00539427	0.918293	None significant
Central Russian wolf	Indian wolf	Chinese indigenous dog 2	Israeli golden jackal	-0.0573683	0.00405267	-14.1557	Central Russian wolf and Chinese indigenous dog 2
Eastern Russian wolf	Indian wolf	Chinese indigenous dog 2	Israeli golden jackal	-0.0682392	0.0039872	-17.1146	Eastern Russian wolf and Chinese indigenous dog 2
Indian wolf	Inner Mongolia wolf 1	Chinese indigenous dog 2	Israeli golden jackal	0.045034	0.00426035	10.5705	Inner Mongolia wolf 1 and Chinese indigenous dog 2
Indian wolf	Inner Mongolia wolf 2	Chinese indigenous dog 2	Israeli golden jackal	0.0778377	0.00385295	20.2021	Inner Mongolia wolf 2 and Chinese indigenous dog 2
Indian wolf	Inner Mongolia wolf 3	Chinese indigenous dog 2	Israeli golden jackal	0.0549669	0.0036475	15.0697	Inner Mongolia wolf 3 and Chinese indigenous dog 2
Indian wolf	Inner Mongolia wolf 4	Chinese indigenous dog 2	Israeli golden jackal	0.0490976	0.00361789	13.5708	Inner Mongolia wolf 4 and Chinese indigenous dog 2
Indian wolf	Xinjiang wolf 1	Chinese indigenous dog 2	Israeli golden jackal	0.0421902	0.00367474	11.4811	Xinjiang wolf 1 and Chinese indigenous dog 2
Indian wolf	Xinjiang wolf 2	Chinese indigenous dog 2	Israeli golden jackal	0.0403344	0.00351235	11.4836	Xinjiang wolf 2 and Chinese indigenous dog 2
Indian wolf	Qinghai wolf 1	Chinese indigenous dog 2	Israeli golden jackal	0.0244188	0.00420348	5.80919	Qinghai wolf 1 and Chinese indigenous dog 2
Indian wolf	Qinghai wolf 2	Chinese indigenous dog 2	Israeli golden jackal	0.010537	0.00487574	2.16111	None significant
Indian wolf	Tibetan wolf 1	Chinese indigenous dog 2	Israeli golden jackal	-0.00640939	0.00530184	-1.2089	None significant
Indian wolf	Tibetan wolf 2	Chinese indigenous dog 2	Israeli golden jackal	-0.0039225	0.00546037	-0.718358	None significant
Indian wolf	Central Russian wolf	Chinese indigenous dog 2	Israeli golden jackal	0.0571259	0.00412154	13.8603	Central Russian wolf and Chinese indigenous dog 2
Indian wolf	Eastern Russian wolf	Chinese indigenous dog 2	Israeli golden jackal	0.0703495	0.00391378	17.9748	Eastern Russian wolf and Chinese indigenous dog 2
Inner Mongolia wolf 1	Indian wolf	Chinese indigenous dog 3	Israeli golden jackal	-0.042249	0.00408022	-10.3546	Inner Mongolia wolf 1 and Chinese indigenous dog 3
Inner Mongolia wolf 2	Indian wolf	Chinese indigenous dog 3	Israeli golden jackal	-0.0833757	0.00379097	-21.9932	Inner Mongolia wolf 2 and Chinese indigenous dog 3
Inner Mongolia wolf 3	Indian wolf	Chinese indigenous dog 3	Israeli golden jackal	-0.0501403	0.0036621	-13.6917	Inner Mongolia wolf 3 and Chinese indigenous dog 3
Inner Mongolia wolf 4	Indian wolf	Chinese indigenous dog 3	Israeli golden jackal	-0.0471775	0.00342273	-13.7836	Inner Mongolia wolf 4 and Chinese indigenous dog 3
Xinjiang wolf 1	Indian wolf	Chinese indigenous dog 3	Israeli golden jackal	-0.0366044	0.00359149	-10.192	Xinjiang wolf 1 and Chinese indigenous dog 3
Xinjiang wolf 2	Indian wolf	Chinese indigenous dog 3	Israeli golden jackal	-0.0394212	0.00369093	-10.6806	Xinjiang wolf 2 and Chinese indigenous dog 3
Qinghai wolf 1	Indian wolf	Chinese indigenous dog 3	Israeli golden jackal	-0.0162895	0.00414349	-3.93135	Qinghai wolf 1 and Chinese indigenous dog 3
Qinghai wolf 2	Indian wolf	Chinese indigenous dog 3	Israeli golden jackal	-0.00864966	0.00500205	-1.72922	None significant
Tibetan wolf 1	Indian wolf	Chinese indigenous dog 3	Israeli golden jackal	0.00873089	0.00548693	1.59122	None significant
Tibetan wolf 2	Indian wolf	Chinese indigenous dog 3	Israeli golden jackal	0.00663883	0.00560285	1.1849	None significant
Central Russian wolf	Indian wolf	Chinese indigenous dog 3	Israeli golden jackal	-0.062047	0.00409348	-15.1575	Central Russian wolf and Chinese indigenous dog 3
Eastern Russian wolf	Indian wolf	Chinese indigenous dog 3	Israeli golden jackal	-0.0707335	0.00399895	-17.688	Eastern Russian wolf and Chinese indigenous dog 3
Indian wolf	Inner Mongolia wolf 1	Chinese indigenous dog 3	Israeli golden jackal	0.0439833	0.00410851	10.7054	Inner Mongolia wolf 1 and Chinese indigenous dog 3
Indian wolf	Inner Mongolia wolf 2	Chinese indigenous dog 3	Israeli golden jackal	0.0828103	0.00383712	21.5814	Inner Mongolia wolf 2 and Chinese indigenous dog 3
Indian wolf	Inner Mongolia wolf 3	Chinese indigenous dog 3	Israeli golden jackal	0.0505218	0.00362618	13.9325	Inner Mongolia wolf 3 and Chinese indigenous dog 3
Indian wolf	Inner Mongolia wolf 4	Chinese indigenous dog 3	Israeli golden jackal	0.0482783	0.00342366	14.1014	Inner Mongolia wolf 4 and Chinese indigenous dog 3
Indian wolf	Xinjiang wolf 1	Chinese indigenous dog 3	Israeli golden jackal	0.0367503	0.00373246	9.84613	Xinjiang wolf 1 and Chinese indigenous dog 3
Indian wolf	Xinjiang wolf 2	Chinese indigenous dog 3	Israeli golden jackal	0.0402943	0.00364984	11.04	Xinjiang wolf 2 and Chinese indigenous dog 3
Indian wolf	Qinghai wolf 1	Chinese indigenous dog 3	Israeli golden jackal	0.0185628	0.00419591	4.42402	Qinghai wolf 1 and Chinese indigenous dog 3
Indian wolf	Qinghai wolf 2	Chinese indigenous dog 3	Israeli golden jackal	0.00892691	0.00500591	1.78327	None significant
Indian wolf	Tibetan wolf 1	Chinese indigenous dog 3	Israeli golden jackal	-0.00821729	0.0054713	-1.50189	None significant
Indian wolf	Tibetan wolf 2	Chinese indigenous dog 3	Israeli golden jackal	-0.00829351	0.00567833	-1.46056	None significant
Indian wolf	Central Russian wolf	Chinese indigenous dog 3	Israeli golden jackal	0.0623683	0.00413029	15.1002	Central Russian wolf and Chinese indigenous dog 3
Indian wolf	Eastern Russian wolf	Chinese indigenous dog 3	Israeli golden jackal	0.0722446	0.00406381	17.7775	Eastern Russian wolf and Chinese indigenous dog 3
Inner Mongolia wolf 1	Indian wolf	Tibetan Mastiff	Israeli golden jackal	-0.0335299	0.00408363	-8.2108	Inner Mongolia wolf 1 and Tibetan Mastiff
Inner Mongolia wolf 2	Indian wolf	Tibetan Mastiff	Israeli golden jackal	-0.0731268	0.0037241	-19.6361	Inner Mongolia wolf 2 and Tibetan Mastiff
Inner Mongolia wolf 3	Indian wolf	Tibetan Mastiff	Israeli golden jackal	-0.0407839	0.00332131	-12.2795	Inner Mongolia wolf 3 and Tibetan Mastiff
Inner Mongolia wolf 4	Indian wolf	Tibetan Mastiff	Israeli golden jackal	-0.0379186	0.00343548	-11.0374	Inner Mongolia wolf 4 and Tibetan Mastiff
Xinjiang wolf 1	Indian wolf	Tibetan Mastiff	Israeli golden jackal	-0.0328539	0.00360039	-9.12511	Xinjiang wolf 1 and Tibetan Mastiff
Xinjiang wolf 2	Indian wolf	Tibetan Mastiff	Israeli golden jackal	-0.03364	0.00347776	-9.6729	Xinjiang wolf 2 and Tibetan Mastiff
Qinghai wolf 1	Indian wolf	Tibetan Mastiff	Israeli golden jackal	-0.0110857	0.00422324	-2.62492	None significant
Qinghai wolf 2	Indian wolf	Tibetan Mastiff	Israeli golden jackal	8.68711e-05	0.00499097	0.0174057	None significant
Tibetan wolf 1	Indian wolf	Tibetan Mastiff	Israeli golden jackal	0.0155759	0.00544947	2.85824	None significant
Tibetan wolf 2	Indian wolf	Tibetan Mastiff	Israeli golden jackal	0.0122829	0.00557003	2.20517	None significant
Central Russian wolf	Indian wolf	Tibetan Mastiff	Israeli golden jackal	-0.0539771	0.00374852	-14.3996	Central Russian wolf and Tibetan Mastiff
Eastern Russian wolf	Indian wolf	Tibetan Mastiff	Israeli golden jackal	-0.0627785	0.00394016	-15.933	Eastern Russian wolf and Tibetan Mastiff
Indian wolf	Inner Mongolia wolf 1	Tibetan Mastiff	Israeli golden jackal	0.0342757	0.00404524	8.4731	Inner Mongolia wolf 1 and Tibetan Mastiff
Indian wolf	Inner Mongolia wolf 2	Tibetan Mastiff	Israeli golden jackal	0.0733675	0.00371928	19.7263	Inner Mongolia wolf 2 and Tibetan Mastiff
Indian wolf	Inner Mongolia wolf 3	Tibetan Mastiff	Israeli golden jackal	0.043034	0.0033041	13.0244	Inner Mongolia wolf 3 and Tibetan Mastiff
Indian wolf	Inner Mongolia wolf 4	Tibetan Mastiff	Israeli golden jackal	0.0388617	0.00342866	11.3344	Inner Mongolia wolf 4 and Tibetan Mastiff
Indian wolf	Xinjiang wolf 1	Tibetan Mastiff	Israeli golden jackal	0.031537	0.00355494	8.87132	Xinjiang wolf 1 and Tibetan Mastiff
Indian wolf	Xinjiang wolf 2	Tibetan Mastiff	Israeli golden jackal	0.035979	0.0034896	10.3104	Xinjiang wolf 2 and Tibetan Mastiff
Indian wolf	Qinghai wolf 1	Tibetan Mastiff	Israeli golden jackal	0.0124725	0.0042495	2.93505	None significant
Indian wolf	Qinghai wolf 2	Tibetan Mastiff	Israeli golden jackal	0.000181535	0.00501636	0.0361885	None significant
Indian wolf	Tibetan wolf 1	Tibetan Mastiff	Israeli golden jackal	-0.0159451	0.0054968	-2.9008	None significant
Indian wolf	Tibetan wolf 2	Tibetan Mastiff	Israeli golden jackal	-0.0111131	0.00560736	-1.98188	None significant
Indian wolf	Central Russian wolf	Tibetan Mastiff	Israeli golden jackal	0.0524824	0.00374189	14.0256	Central Russian wolf and Tibetan Mastiff
Indian wolf	Eastern Russian wolf	Tibetan Mastiff	Israeli golden jackal	0.0635042	0.0039703	15.9948	Eastern Russian wolf and Tibetan Mastiff
Inner Mongolia wolf 1	Indian wolf	Dingo	Israeli golden jackal	-0.0543268	0.00486525	-11.1663	Inner Mongolia wolf 1 and Dingo
Inner Mongolia wolf 2	Indian wolf	Dingo	Israeli golden jackal	-0.0747386	0.00456031	-16.3889	Inner Mongolia wolf 2 and Dingo
Inner Mongolia wolf 3	Indian wolf	Dingo	Israeli golden jackal	-0.0514005	0.00432884	-11.874	Inner Mongolia wolf 3 and Dingo
Inner Mongolia wolf 4	Indian wolf	Dingo	Israeli golden jackal	-0.054162	0.00362094	-14.958	Inner Mongolia wolf 4 and Dingo
Xinjiang wolf 1	Indian wolf	Dingo	Israeli golden jackal	-0.0363488	0.00443151	-8.20236	Xinjiang wolf 1 and Dingo
Xinjiang wolf 2	Indian wolf	Dingo	Israeli golden jackal	-0.0411695	0.00337056	-12.2144	Xinjiang wolf 2 and Dingo
Qinghai wolf 1	Indian wolf	Dingo	Israeli golden jackal	-0.0295622	0.00424024	-6.97184	Qinghai wolf 1 and Dingo
Qinghai wolf 2	Indian wolf	Dingo	Israeli golden jackal	-0.0198786	0.00520853	-3.81655	Qinghai wolf 2 and Dingo
Tibetan wolf 1	Indian wolf	Dingo	Israeli golden jackal	-0.00117783	0.00548133	-0.214881	None significant
Tibetan wolf 2	Indian wolf	Dingo	Israeli golden jackal	-0.00478269	0.00553875	-0.863495	None significant
Central Russian wolf	Indian wolf	Dingo	Israeli golden jackal	-0.0527386	0.00481277	-10.9581	Central Russian wolf and Dingo
Eastern Russian wolf	Indian wolf	Dingo	Israeli golden jackal	-0.065875	0.00419507	-15.703	Eastern Russian wolf and Dingo
Indian wolf	Inner Mongolia wolf 1	Dingo	Israeli golden jackal	0.0536899	0.00485222	11.065	Inner Mongolia wolf 1 and Dingo
Indian wolf	Inner Mongolia wolf 2	Dingo	Israeli golden jackal	0.0753345	0.00459358	16.4	Inner Mongolia wolf 2 and Dingo
Indian wolf	Inner Mongolia wolf 3	Dingo	Israeli golden jackal	0.0506198	0.00427227	11.8485	Inner Mongolia wolf 3 and Dingo
Indian wolf	Inner Mongolia wolf 4	Dingo	Israeli golden jackal	0.0520228	0.00373497	13.9286	Inner Mongolia wolf 4 and Dingo
Indian wolf	Xinjiang wolf 1	Dingo	Israeli golden jackal	0.0361832	0.00448744	8.06322	Xinjiang wolf 1 and Dingo
Indian wolf	Xinjiang wolf 2	Dingo	Israeli golden jackal	0.0392443	0.00329009	11.928	Xinjiang wolf 2 and Dingo
Indian wolf	Qinghai wolf 1	Dingo	Israeli golden jackal	0.0290978	0.00424551	6.85378	Qinghai wolf 1 and Dingo
Indian wolf	Qinghai wolf 2	Dingo	Israeli golden jackal	0.0187361	0.00525619	3.56457	Qinghai wolf 2 and Dingo
Indian wolf	Tibetan wolf 1	Dingo	Israeli golden jackal	0.000325263	0.00553945	0.0587175	None significant
Indian wolf	Tibetan wolf 2	Dingo	Israeli golden jackal	0.00707956	0.00554148	1.27756	None significant
Indian wolf	Central Russian wolf	Dingo	Israeli golden jackal	0.0521371	0.00480012	10.8616	Central Russian wolf and Dingo
Indian wolf	Eastern Russian wolf	Dingo	Israeli golden jackal	0.0668084	0.00417255	16.0114	Eastern Russian wolf and Dingo
Israeli wolf	Indian wolf	Basenji	Israeli golden jackal	-0.0746114	0.00594553	-12.5492	Israeli wolf and Basenji
Iranian wolf	Indian wolf	Basenji	Israeli golden jackal	-0.00570074	0.00410065	-1.3902	None significant
Croatian wolf	Indian wolf	Basenji	Israeli golden jackal	-0.0221893	0.00362981	-6.11306	Croatian wolf and Basenji
Western Russian wolf	Indian wolf	Basenji	Israeli golden jackal	-0.0435948	0.00530126	-8.22348	Western Russian wolf and Basenji
Italian wolf	Indian wolf	Basenji	Israeli golden jackal	-0.0212352	0.00391942	-5.41794	Italian wolf and Basenji
Portuguese wolf	Indian wolf	Basenji	Israeli golden jackal	-0.017168	0.00401505	-4.2759	Portuguese wolf and Basenji
Spanish wolf	Indian wolf	Basenji	Israeli golden jackal	-0.0655869	0.00575725	-11.3921	Spanish wolf and Basenji
Indian wolf	Israeli wolf	Basenji	Israeli golden jackal	0.0727876	0.00587772	12.3836	Israeli wolf and Basenji
Indian wolf	Iranian wolf	Basenji	Israeli golden jackal	0.00506298	0.00414127	1.22257	None significant
Indian wolf	Croatian wolf	Basenji	Israeli golden jackal	0.022073	0.00362086	6.09605	Croatian wolf and Basenji
Indian wolf	Western Russian wolf	Basenji	Israeli golden jackal	0.0438986	0.00519497	8.45022	Western Russian wolf and Basenji
Indian wolf	Italian wolf	Basenji	Israeli golden jackal	0.020306	0.00395613	5.13279	Italian wolf and Basenji
Indian wolf	Portuguese wolf	Basenji	Israeli golden jackal	0.0171028	0.00407328	4.19877	Portuguese wolf and Basenji
Indian wolf	Spanish wolf	Basenji	Israeli golden jackal	0.0673992	0.00571322	11.7971	Spanish wolf and Basenji
Israeli wolf	Indian wolf	Boxer	Israeli golden jackal	-0.094261	0.00631445	-14.9278	Israeli wolf and Boxer
Iranian wolf	Indian wolf	Boxer	Israeli golden jackal	-0.00564679	0.0039668	-1.42351	None significant
Croatian wolf	Indian wolf	Boxer	Israeli golden jackal	-0.0762763	0.00406192	-18.7784	Croatian wolf and Boxer
Western Russian wolf	Indian wolf	Boxer	Israeli golden jackal	-0.101832	0.00539321	-18.8816	Western Russian wolf and Boxer
Italian wolf	Indian wolf	Boxer	Israeli golden jackal	-0.0644883	0.00416278	-15.4916	Italian wolf and Boxer
Portuguese wolf	Indian wolf	Boxer	Israeli golden jackal	-0.0400154	0.00427183	-9.36728	Portuguese wolf and Boxer
Spanish wolf	Indian wolf	Boxer	Israeli golden jackal	-0.11229	0.00707097	-15.8804	Spanish wolf and Boxer
Indian wolf	Israeli wolf	Boxer	Israeli golden jackal	0.0951275	0.00619094	15.3656	Israeli wolf and Boxer
Indian wolf	Iranian wolf	Boxer	Israeli golden jackal	0.00589643	0.00391185	1.50732	None significant
Indian wolf	Croatian wolf	Boxer	Israeli golden jackal	0.0739958	0.00410109	18.043	Croatian wolf and Boxer
Indian wolf	Western Russian wolf	Boxer	Israeli golden jackal	0.0994915	0.00544613	18.2683	Western Russian wolf and Boxer
Indian wolf	Italian wolf	Boxer	Israeli golden jackal	0.0663692	0.00416753	15.9253	Italian wolf and Boxer
Indian wolf	Portuguese wolf	Boxer	Israeli golden jackal	0.0389853	0.00429177	9.08373	Portuguese wolf and Boxer
Indian wolf	Spanish wolf	Boxer	Israeli golden jackal	0.11213	0.00703995	15.9276	Spanish wolf and Boxer

## Sheet: NewWorld
Table S3. ABBA-BABA test (D-statistic) using Israeli golden jackal as outgroup for New World wolves. Different dogs were put in P3 in the tests. Three Chinese indigenous dogs, boxer, and dingo were included. Z score with absolute value bigger than 3 was considered significant.
P1	P2	P3	O	D Statistic	Standard Error	Z Score	Significant and Direction
Mexican wolf	Yellow stone wolf 1	Boxer	Israeli golden jackal	-0.00651492	0.00744565	-0.874997	None significant
Mexican wolf	Yellow stone wolf 1	Chinese indigenous dog 1	Israeli golden jackal	-0.00111039	0.00644076	-0.172401	None significant
Mexican wolf	Yellow stone wolf 1	Chinese indigenous dog 2	Israeli golden jackal	0.00910878	0.00595313	1.53008	None significant
Mexican wolf	Yellow stone wolf 1	Chinese indigenous dog 3	Israeli golden jackal	0.00778451	0.00619159	1.25727	None significant
Mexican wolf	Yellow stone wolf 1	Dingo	Israeli golden jackal	0.00108384	0.0063755	0.17	None significant
Yellow stone wolf 1	Mexican wolf	Boxer	Israeli golden jackal	0.00565887	0.00745226	0.759349	None significant
Yellow stone wolf 1	Mexican wolf	Chinese indigenous dog 1	Israeli golden jackal	0.000962581	0.00639273	0.150574	None significant
Yellow stone wolf 1	Mexican wolf	Chinese indigenous dog 2	Israeli golden jackal	-0.00798793	0.00587679	-1.35923	None significant
Yellow stone wolf 1	Mexican wolf	Chinese indigenous dog 3	Israeli golden jackal	-0.00723402	0.00614408	-1.1774	None significant
Yellow stone wolf 1	Mexican wolf	Dingo	Israeli golden jackal	-0.000835443	0.0064128	-0.130277	None significant
Mexican wolf	Yellow stone wolf 2	Boxer	Israeli golden jackal	-0.010097	0.00699529	-1.4434	None significant
Mexican wolf	Yellow stone wolf 2	Chinese indigenous dog 1	Israeli golden jackal	-0.00463004	0.00608706	-0.760637	None significant
Mexican wolf	Yellow stone wolf 2	Chinese indigenous dog 2	Israeli golden jackal	0.00847505	0.0055092	1.53835	None significant
Mexican wolf	Yellow stone wolf 2	Chinese indigenous dog 3	Israeli golden jackal	0.00387842	0.00591887	0.655264	None significant
Mexican wolf	Yellow stone wolf 2	Dingo	Israeli golden jackal	0.00155173	0.00586125	0.264743	None significant
Yellow stone wolf 2	Mexican wolf	Boxer	Israeli golden jackal	0.00813659	0.00701946	1.15915	None significant
Yellow stone wolf 2	Mexican wolf	Chinese indigenous dog 1	Israeli golden jackal	0.00464549	0.00603019	0.770371	None significant
Yellow stone wolf 2	Mexican wolf	Chinese indigenous dog 2	Israeli golden jackal	-0.00715939	0.00552259	-1.29638	None significant
Yellow stone wolf 2	Mexican wolf	Chinese indigenous dog 3	Israeli golden jackal	-0.00436216	0.00593821	-0.734592	None significant
Yellow stone wolf 2	Mexican wolf	Dingo	Israeli golden jackal	-0.0024844	0.00590613	-0.420647	None significant
