# Supplementary material for: Worldwide patterns of genomic variation and admixture in gray wolves
Source: HighWire-hosted journal article supplement (doi:10.1101/gr.197517.115), 2015-12-17
Supplement: SuppTable_4.xlsx [file SuppTable_4.xlsx]

## Sheet: Sheet1
Table S4. The proportion dog ancestry in the genomes of Old World wolves. Only the wolves showed significant gene flow with dogs in ABBA-BABA tests were included. For Asian wolf, we estimated the proportion of Chinese indigenous dogs ancestry in their genomes. For the European and Middle Eastern wolf, we estimated the proportion of basenji and boxer ancestry in their genomes.
Asian wolf	Proportion of Chinese indigenous dog 1 ancestry (%)	Proportion of Chinese indigenous dog 2 ancestry (%)	Proportion of Chinese indigenous dog 3 ancestry (%)	Averaged proportion (%)
Inner Mongolia wolf 1	9.03867	12.0603	11.4701	10.8563
Inner Mongolia wolf 2	22.3369	20.8452	21.5955	21.5925
Inner Mongolia wolf 3	11.5715	14.7203	13.1752	13.1557
Inner Mongolia wolf 4	10.4283	13.1485	12.5901	12.0556
Xinjiang wolf 1	9.27994	11.2987	9.58383	10.0541
Xinjiang wolf 2	9.30566	10.8017	10.508	10.2051
Central Russian wolf	17.3759	15.2985	16.2645	16.313
Eastern Russian wolf	19.5178	18.8398	18.8401	19.0659
European and Middle Eastern wolf	Proportion of basenji and boxer ancestry (%)
Israeli wolf	23.54
Croatian wolf	13.76
Western Russian wolf	20.37
Italian wolf	12.41
Portuguese wolf	7.97
Spanish wolf	25.32
