# Supplementary material for: Worldwide patterns of genomic variation and admixture in gray wolves
Source: HighWire-hosted journal article supplement (doi:10.1101/gr.197517.115), 2015-12-17
Supplement: SuppTable_5.docx [file SuppTable_5.docx]

Table S5 Population sizes inferred from G-PhoCS.

| Population sizes (individuals) | |
| --- | --- |
| New World-Old world | 45,100 (44,400 – 45,900) 1 |
| Wolf-Dog | 8,000 (3,400 – 16,100) 1 |
| New World | 17,300 (13,000-21,700) 1 |
| Tibetan wolf | 2,500 (2,300-2,700) 2 |
| Inner Mongolian wolf | 9,400 (8,400-10,600) 2 |
| Xinjiang Wolf | 20,800 (17,500-24,600) 3 |
| Qinghai wolf | 93,700 (75,300 – 116,300) 2 |
| Russian wolf | 13,500 (11,400 – 15,700) 2 |
| Croatian wolf | 4,600 (3,900-5,300) 4 |
| Israeli wolf | 16,600 (12,700 – 21,900) 4 |
| Indian wolf-Iranian wolf | 6,200 (5,400-7,000) 4 |
| Mexican wolf | 600 (400-700) 1 |
| Yellowstone wolf | 3,500 (2,600-4,300) 1 |
| Dog | 2,000 (1,400 – 2,700) 1 |
| Basenji | 1,600 (1,500 – 1,800) 1 |
| Dingo | 1,000 (900 – 1,100) 1 |
| Chinese indigenous dog | 26,100 (18,600 – 36,700) 1 |

1 estimated in ‘global’ run of G-PhoCS

2 estimated in ‘asian’ run of G-PhoCS with Inner Mongolian wolf

3 estimated in ‘asian run of G-PhoCS with Xinjiang wolf

4 estimated in ‘european’ run of G-PhoCS
