# Supplementary material for: Worldwide patterns of genomic variation and admixture in gray wolves
Source: HighWire-hosted journal article supplement (doi:10.1101/gr.197517.115), 2015-12-17
Supplement: SuppTable_6.docx [file SuppTable_6.docx]

Table S6. Samples used in the demographic inference of G-PhoCS

| Name | Population symbol | Runs used |
| --- | --- | --- |
| Tibetan wolf 1 | TIW | Global, Asian1, Asian2 |
| Tibetan wolf 2 | TIW | Asian1, Asian2 |
| Inner Mongolia wolf 3 | IMW | Global, Asian1 |
| Inner Mongolia wolf 4 | IMW | Asian1 |
| Xinjiang wolf 1 | XJW | Asian2 |
| Xinjiang wolf 2 | XJW | Asian2 |
| Qinghai wolf 1 | QHW | Asian1, Asian2 |
| Qinghai wolf 2 | QHW | Asian1, Asian2 |
| Central Russian wolf | RUW | Asian1, Asian2 |
| Western Russian wolf | RUW | Asian1, Asian2 |
| Indian wolf | INW | European |
| Iranian wolf | IRW | European |
| Israeli wolf | ISW | Global, European |
| Croatian wolf | CRW | Global, European |
| Mexican wolf | MXW | Global |
| Yellow stone wolf 1 | YSW | Global |
| Chinese indigenous dog 1 | CHD | Global, Asian1, Asian2 |
| Chinese indigenous dog 2 | CHD | Asian1, Asian2 |
| Tibetan mastiff | TMD | Global 1 |
| Basenji | BAS | Global, European |
| Dingo | DIN | Global, Asian1, Asian2 |
| Israeli golden jackal | JAC | Global, Asian1, Asian2, European |

1 The Tibetan mastiff genome was analyzed in a separate global run, where it replaced the Chinese indigenous dog genome
